# Supplementary material for: Metabolic adaptation to a high-fat diet is associated with a change in the gut microbiota
Source: HighWire-hosted journal article supplement (doi:10.1136/gutjnl-2011-301012), 2011-11-22
Supplement: gutjnl-2011-301012supp_table1.pdf [file gutjnl-2011-301012supp_table1.pdf]

|                       | HFD-DR                  | HFD-D                   | HFD+GOS                 |
|-----------------------|-------------------------|-------------------------|-------------------------|
| NEFA (fasted)(mmol/L) | 0.52±0.03               | 0.40±0.02** (vs HFD-DR) | 0.34±0.05** (vs HFD-DR) |
| TG (fasted)(mmol/L)   | 0.42±0.02*** (vs HFD-D) | 0.62±0.02               | 0.37±0.01*** (vs HFD-D) |
| TG (fed)(mmol/L)      | 0.61±0.05** (vs HFD-D)  | 0.94±0.06               | 0.53±0.07** (vs HFD-D)  |
| Fasted Insulin (µg/L) | 0.76±0.12               | 0.45±0.03** (vs HFD-DR) | 0.44±0.04* (vs HFD-DR)  |
| Fed Insulin (µg/L)    | 1.83±0.29               | 1.40±0.13               | 1.60±0.22               |

Suppl.Tab.1
