# Supplementary material for: Metabolic adaptation to a high-fat diet is associated with a change in the gut microbiota
Source: HighWire-hosted journal article supplement (doi:10.1136/gutjnl-2011-301012), 2011-11-22
Supplement: gutjnl-2011-301012supp_table2.pdf [file gutjnl-2011-301012supp_table2.pdf]

| <b>Bacteria</b>                       | <b>Primer (5'-3')</b>                                  | <b>Amplicon (bp)</b> | <b>Reference</b>         |
|---------------------------------------|--------------------------------------------------------|----------------------|--------------------------|
| <i>C. leptum</i> cluster IV           | GCACAAGCAGTGGAGT<br>CTTCCTCCGTTTTGTCAA                 | 239                  | Matsuki T et al 2004     |
| <i>Bifidobacterium</i> spp            | GATTCTGGCTCAGGATGAACGC<br>CTGATAGGACGCGACCCCAT         | 202                  | Gueimonde M et al 2004   |
| <i>Bacteroides-Prevotella</i>         | GAAGGTCCCCCACATTG<br>CAATCGGAGTTCTTCGTG                | 418                  | Bartosch S et al 2004    |
| <i>C. coccoides-E. rectale</i> group  | AAATGACGGTACCTGACTAA                                   | 440                  | Matsuki T et al 2002     |
| <i>Clostridium</i> cluster XIVa       | CTTTGAGTTTCATTCTTGCGAA                                 |                      |                          |
| <i>Lactobacillus</i>                  | AGCAGTAGGGAATCTTCCA<br>CACCGCTACACATGGAG               | 341                  | Rinttila T et al 2004    |
| <i>Enterococcus</i> spp               | CCCTTATTGTTAGTTGCCATCATT<br>ACTCGTTGTA CTCCATTGT       | 144                  | Rinttila T et al 2004    |
| <i>Segmented Filamentous Bacteria</i> | AGGAGGAGTCTGCGGCACATTAGC<br>TCCCCACTGCTGCCCTCCCGTAG    | 140                  | Suzuki K et al 2004      |
| <i>Enterobacteriaceae</i> spp         | CATTGACGTTACCCGCAGAAGAAGC<br>CTCTACGAGACTCAAGCTTGC     | 195                  | Bartosch S et al 2004    |
| <i>Desulfovibrio</i> genus            | CCGTAGATATCTGGAGGAACATCAG<br>ACATCTAGCATCCATCGTTTACAGC | 135                  | Bartosch S et al 2004    |
| <i>Nitrospira</i> spp                 | CGCAACCCCTGCTTTCAGT<br>CGTTATCCTGGGCAGTCCTT            | 66                   | Kindaichi T et al 2006   |
| <i>Faecalibacterium prausnitzii</i>   | GGAGGATTGACCCCTTCAGT<br>CTGGTCCCGAAGAAACACAT           | 203                  | Balamurugan R et al 2008 |

**Suppl.Tab.2**
