# Supplementary figures and images for: Metabolic adaptation to a high-fat diet is associated with a change in the gut microbiota
Source: HighWire-hosted journal article supplement (doi:10.1136/gutjnl-2011-301012), 2011-11-22

**A**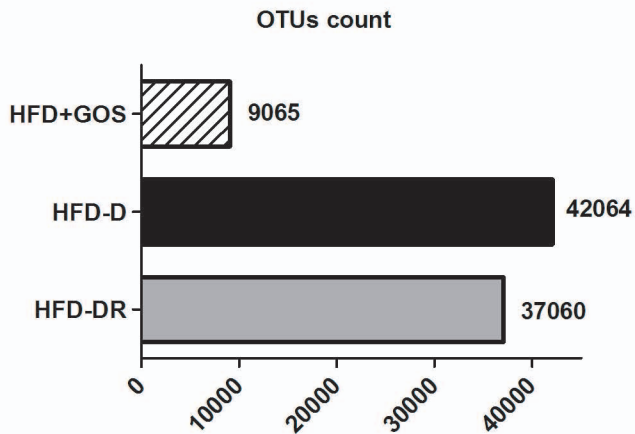**B**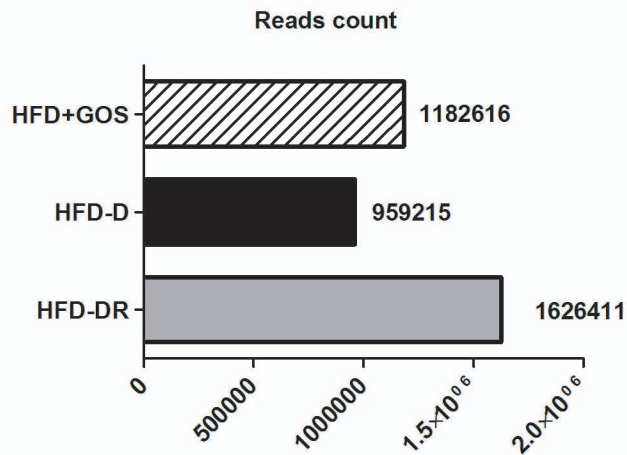

Supplement: gutjnl-2011-301012supp_figure1.pdf [file gutjnl-2011-301012supp_figure1.pdf]

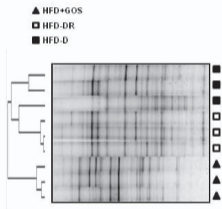

Suppl. Fig. 2

Supplement: gutjnl-2011-301012supp_figure2.pdf [file gutjnl-2011-301012supp_figure2.pdf]

**A**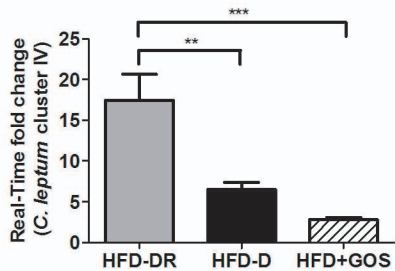**B**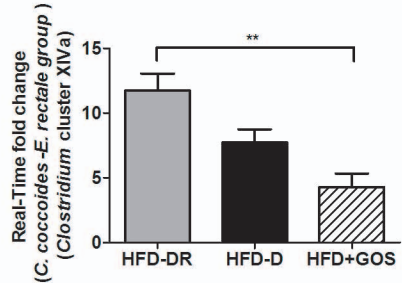**C**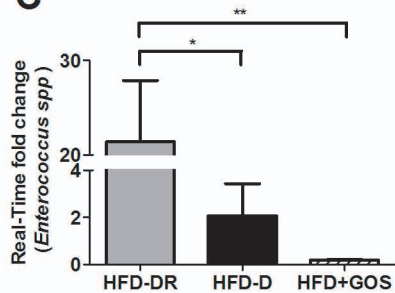**D**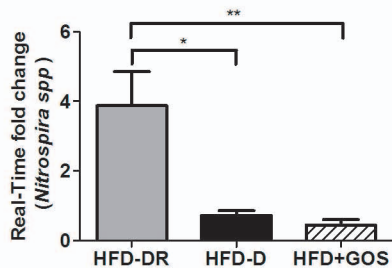**E**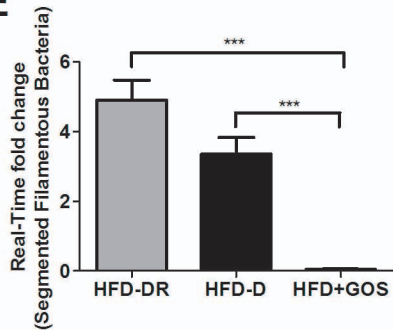**F**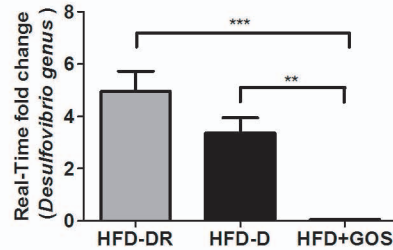

Supplement: gutjnl-2011-301012supp_figure3.pdf [file gutjnl-2011-301012supp_figure3.pdf]

**A**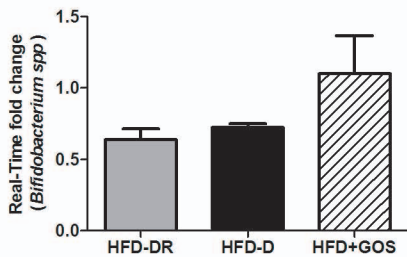**B**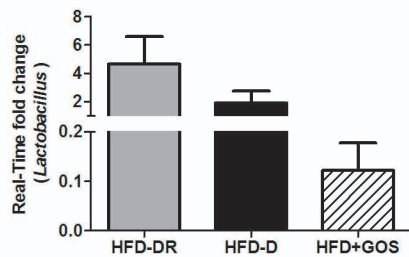**C**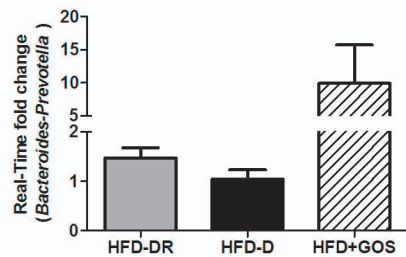**D**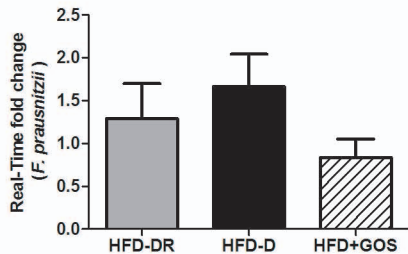**E**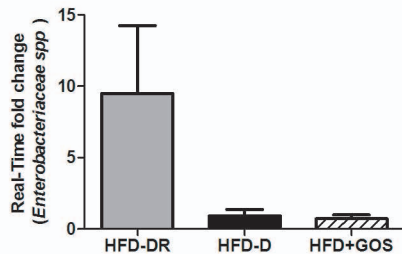

Supplement: gutjnl-2011-301012supp_figure4.pdf [file gutjnl-2011-301012supp_figure4.pdf]

**A**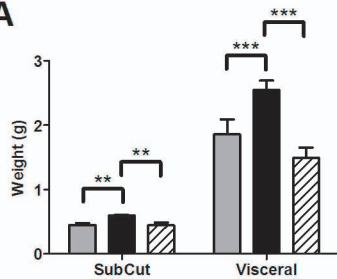**B**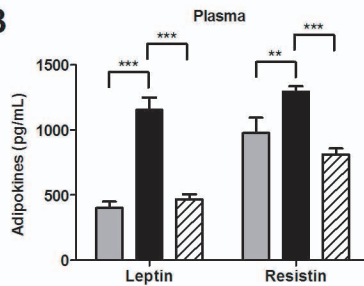**C**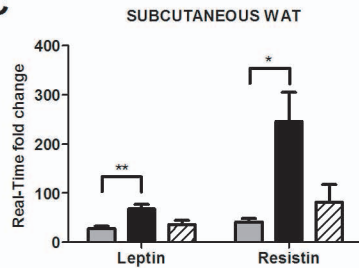**D**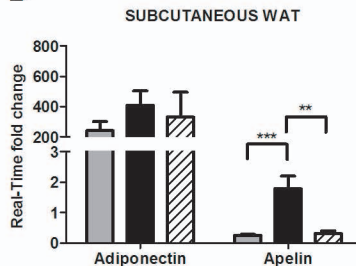**E**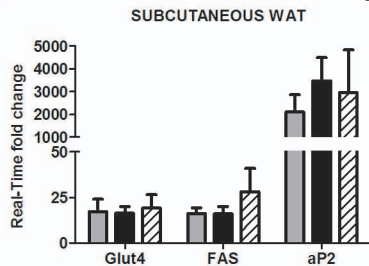**F**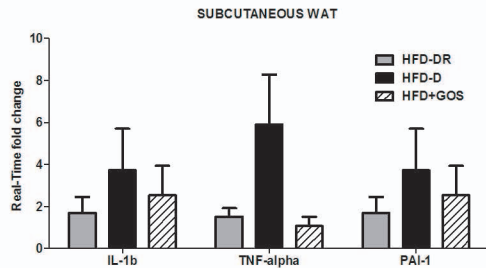

Supplement: gutjnl-2011-301012supp_figure6.pdf [file gutjnl-2011-301012supp_figure6.pdf]

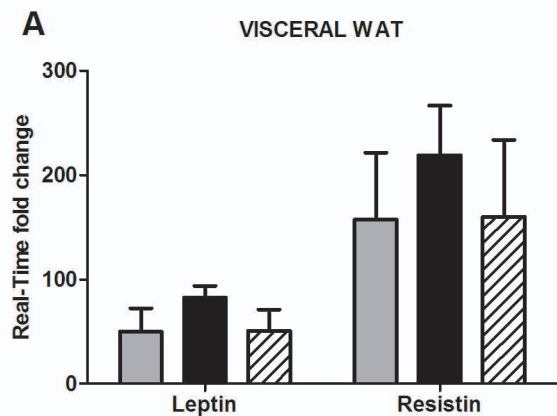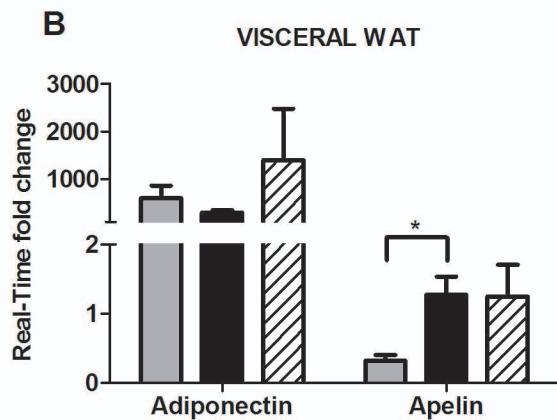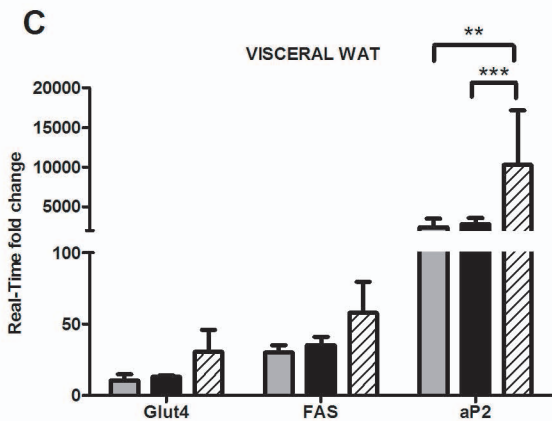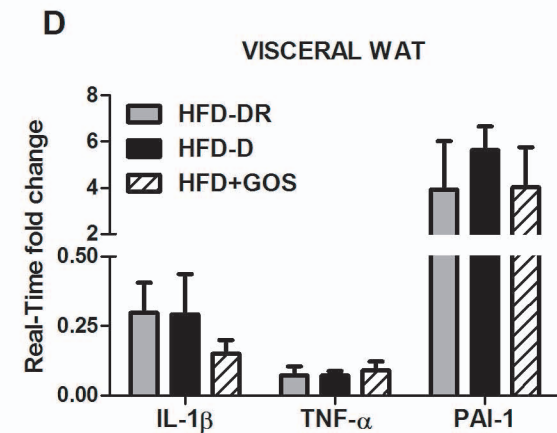

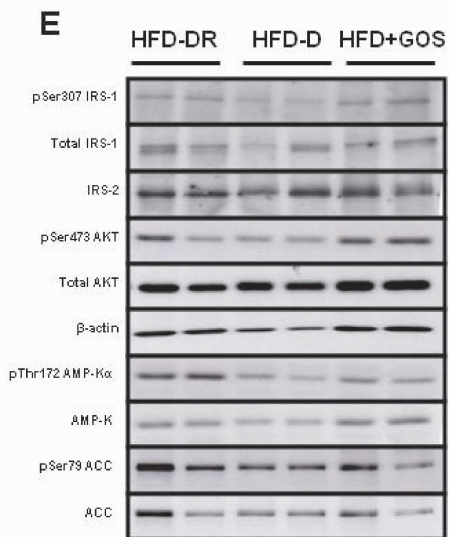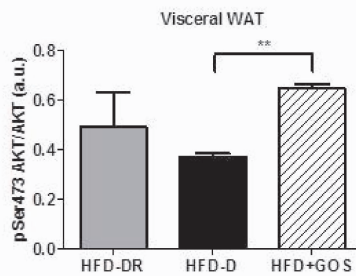

Suppl. Fig.7

Supplement: gutjnl-2011-301012supp_figure7.pdf [file gutjnl-2011-301012supp_figure7.pdf]
